# Supplementary material for: FDG-PET/CT in the Monitoring of Lymphoma Immunotherapy Response: Current Status and Future Prospects
Source: MDPI journal article supplement (doi:10.3390/cancers15041063), 2023-02-07
Supplement: s1 [file s1]

**Table S1:** Summary table demonstrating observed updates and modifications in therapy-specific Criteria applied since Lugano classification  
<sup>1</sup>PET: Positron emission tomography; <sup>2</sup>CT: Computed tomography; <sup>3</sup>FDG: Fluorodeoxyglucose; <sup>4</sup>DS: Deauville score; <sup>5</sup>SPD: Sum of perpendicular diameters; <sup>6</sup>N/A: Not Applicable; <sup>7</sup>IR: Indeterminate response; <sup>8</sup>LD: Long diameter; <sup>9</sup>SLD: Sum of longest diameters.

| Criteria | Complete Response                                 |                                                                                     | Partial Response                              |                                                               | Stable Disease    |                                                    | Progression                                                                                                                                                                                                                                                                                                                               |                                                       |                                                                                    | Pseudoprogression                | Value                                               | Modifications                                                                                                                                                                                                                                                                                      |
|----------|---------------------------------------------------|-------------------------------------------------------------------------------------|-----------------------------------------------|---------------------------------------------------------------|-------------------|----------------------------------------------------|-------------------------------------------------------------------------------------------------------------------------------------------------------------------------------------------------------------------------------------------------------------------------------------------------------------------------------------------|-------------------------------------------------------|------------------------------------------------------------------------------------|----------------------------------|-----------------------------------------------------|----------------------------------------------------------------------------------------------------------------------------------------------------------------------------------------------------------------------------------------------------------------------------------------------------|
|          | PET <sup>1</sup>                                  | CT <sup>2</sup>                                                                     | PET                                           | CT                                                            | PET               | CT                                                 | PET                                                                                                                                                                                                                                                                                                                                       | CT                                                    |                                                                                    |                                  |                                                     |                                                                                                                                                                                                                                                                                                    |
| Lugano   | FDG <sup>3</sup> uptake normalization<br>DS= 1-3. | Reduction of all involved lesion to normal size                                     | FDG uptake Reduction<br>DS <sup>4</sup> = 4-5 | ≥ 50% reduction in SPD <sup>5</sup> of up to 6 target lesions | Stable FDG uptake | No interval change                                 | - Metabolic progression with DS= 4-5<br>- New FDG-avid lesions                                                                                                                                                                                                                                                                            | - ≥ 50% increase in SPD of lesions<br>- New lesion(s) |                                                                                    | Not account for                  | Widely used                                         | N/A <sup>6</sup>                                                                                                                                                                                                                                                                                   |
| LYRIC    | FDG uptake normalization<br>DS= 1-3.              | Reduction of all involved lesion to normal size                                     | FDG uptake Reduction<br>DS= 4-5               | ≥ 50% reduction in SPD of up to 6 target lesions              | Stable FDG uptake | No interval change                                 | Labelled IR <sup>7</sup> :<br>- IR(1): >50% increase in SPD in first 12 weeks<br>-IR(2): >50% increase in SPD with emergence of new lesion(s), or >50% increase in PPD of a lesion or set of lesions at any time during treatment<br>-IR(3): Increase in FDG uptake without a concomitant increase in lesion size meeting criteria for PD |                                                       | Diagnosed retrospectively after achieving metabolic response following initial DP. | Accounting for pseudoprogression | Adding IR category to account for pseudoprogression |                                                                                                                                                                                                                                                                                                    |
| RECIL    | FDG uptake normalization<br>DS= 1-3.              | Complete resolution of all target lesions and all nodes with LD <sup>8</sup> < 1 cm | FDG uptake Reduction<br>DS= 4-5               | ≥ 30% decrease in SLD <sup>9</sup> of target lesions.         | Any DS            | Decrease < 10% to increase ≤ 20% in target lesions | Any DS                                                                                                                                                                                                                                                                                                                                    | > 20% increase in SLD                                 |                                                                                    | Same as LYRIC                    | Accounting for pseudoprogression                    | - Adding new category under the name of (Minor Response) associated with reduction in SLD between ≥ 10% and < 30%.<br>-Progressive and minor response do not require correlation with Deauville criteria<br>- Using Uni-dimensional, longest diameter of any target lesion to measure tumor burden |

**Table S2:** Summary table demonstrating previous observations from the utilization of immune checkpoint inhibitors in lymphoma

| Author/              | Year of publication | No. of patients | Median follow-up | Lymphoma type    | Therapy regimen            | Purpose                                                                                                  | Observation                                                                                                        |
|----------------------|---------------------|-----------------|------------------|------------------|----------------------------|----------------------------------------------------------------------------------------------------------|--------------------------------------------------------------------------------------------------------------------|
| Ansell et al. [72]   | 2015                | 23              | 40 weeks         | R/R HL           | Nivolumab                  | Safety and efficacy                                                                                      | Safety and efficacy established                                                                                    |
| Armand et al. [73]   | 2016                | 31              | 18 months        | R/R HL           | Pembroluzimab              | Safety and efficacy                                                                                      | Safety and efficacy established                                                                                    |
| Younes et al. [75]   | 2016                | 80              | 9 months         | R/R HL           | Nivolumab                  | Safety and efficacy                                                                                      | Safety and efficacy established                                                                                    |
| Chen et al. [74]     | 2017                | 210             | 10 months        | R/R HL           | Pembroluzimab              | Safety and efficacy                                                                                      | Safety and efficacy established                                                                                    |
| Ansell et al. [112]  | 2019                | 121             | 9 months         | R/R DLBCL        | Nivolumab                  | Safety and efficacy                                                                                      | Safety established with suboptimal response rates                                                                  |
| Younes et al. [123]  | 2019                | 42              | 21 months        | Untreated DLBCL  | Atezolizumab + R-CHOP      | Safety and efficacy                                                                                      | Encouraging results obtained                                                                                       |
| Smith et al. [122]   | 2020                | 30              | 26 months        | Untreated DLBCL  | Pembroluzimab + R-CHOP     | Efficacy and survival                                                                                    | Excellent response and survival outcomes                                                                           |
| Dercle et al. [76]   | 2018                | 16              | 23 months        | R/R HL           | Pembrolizumab or nivolumab | Response assessment through the use of Lugano/LYRIC Criteria                                             | Unique immunotherapy patterns observed in 31% of case                                                              |
| Castello et al. [59] | 2019                | 43              | 19 months        | R/R HL           | Pembrolizumab or nivolumab | FDG PET/CT role in therapy response assessment through the use of Lugano/LYRIC Criteria + PET parameters | Early FDG PET/CT reliability in response assessment is established                                                 |
| Park et al. [83]     | 2022                | 83              | 22 months        | Limited stage HL | Nivolumab following BV-AVD | Efficacy and survival                                                                                    | Favorable safety and clinical outcomes of BV-AVD induction followed by Nivolumab consolidation in limited stage HL |

**Table S3:** Summary table demonstrating previous observations from the utilization of CAR-T in Non-Hodgkin’s Lymphoma.

| Author/              | Year of publication | No. of patients | Median follow-up | Lymphoma type | Purpose                                                                          | Observation                                                                                                                                                                                   |
|----------------------|---------------------|-----------------|------------------|---------------|----------------------------------------------------------------------------------|-----------------------------------------------------------------------------------------------------------------------------------------------------------------------------------------------|
| Shah et al. [124]    | 2018                | 7               | 11.5 months      | NHL           | FDG PET/CT role in therapy response assessment                                   | MTV predictive value is observed                                                                                                                                                              |
| Cohen et al. [125]   | 2022                | 48              | 12.8 months      | DLBCL         | FDG PET/CT role in therapy response assessment through the use of PET parameters | DS and $\Delta$ SUVmax can help identify treatment failure at TD interval                                                                                                                     |
| Galtier et al. [126] | 2022                | 160             | 12.6 months      | R/R LBCL      | FDG PET/CT role in therapy response assessment                                   | High predictive value for both 5 PS and MTV have been observed                                                                                                                                |
| Kuhnl et al. [127]   | 2022                | 171             | 14.5             | R/R LBCL      | FDG PET/CT role in therapy response assessment                                   | Early PET/CT response can predict CAR-T failure in LBCL                                                                                                                                       |
| Breen et al. [128]   | 2022                | 69              | 13.3             | R/R LBCL      | Prognostic role of FDG PET/CT                                                    | SUVmax threshold of 10 can provide prognostic feedback                                                                                                                                        |
| Al Zaki et al. [129] | 2022                | 206             | 12               | R/R LBCL      | Prognostic role of FDG PET/CT                                                    | SUVmax threshold of 10 at M1 can provide prognostic feedback                                                                                                                                  |
| Wang et al. [130]    | 2019                | 19              | 5                | R/R NHL       | FDG PET/CT role in assessment of CAR-T related side effects                      | High tumor burden observed by PET/CT was related                                                                                                                                              |
| Bailly et al. [131]  | 2022                | 40              | 5.4              | NHL           | Prognostic role of FDG PET/CT                                                    | PET/CT observed more events in patients with inadequate lymphodepletion prior to CAR-T transfusion considering the beneficial effects of providing adequate disease control prior to therapy. |
